# Supplementary material
Source: PubMed Central journal article supplement (PMC6335258)
Supplement: mmc1.pdf [file mmc1.pdf]

## Characteristics and Outcomes of Small Cell Lung Cancer Detected by CT Screening

*Anish Thomas, MD; Puskar Pattanayak, MD; Eva Szabo, MD; and Paul Pinsky, PhD*

CHEST 2018; 154(6):1284-1290

*Online supplements are not copyedited prior to posting and the author(s) take full responsibility for the accuracy of all data.*

© 2018 AMERICAN COLLEGE OF CHEST PHYSICIANS. Reproduction of this article is prohibited without written permission from the American College of Chest Physicians. See online for more details. DOI: 10.1016/j.chest.2018.07.029

**e-Table 1.** Screen detected SCLC with only one NCN in the lobe of the cancer

| <b>NCN size</b> | <b>Stage</b> | <b>Tumor Size</b> | <b>Days from last screen to diagnosis</b> |
|-----------------|--------------|-------------------|-------------------------------------------|
| 3.5             | Stage IIIB   | 19                | 702                                       |
| 3.5             | Stage IV     | Missing           | 162                                       |
| 4               | Stage IA     | 8                 | 789                                       |
| 5               | Stage IIIB   | 100               | 183                                       |
| 5.5             | Stage IIIB   | 30                | 95                                        |
| 6               | Stage IIIB   | Missing           | 281                                       |
| 6.5             | Stage IV     | 7                 | 55                                        |
| 9.5             | Stage IV     | 20                | 69                                        |
| 10.5            | Stage IIIA   | 50                | 196                                       |
| 11              | Unknown      | Missing           | 96                                        |
| 11.5            | Stage IIA    | 12                | 54                                        |
| 12.5            | Stage IV     | 30                | 288                                       |
| 14.5            | Stage IIIA   | 20                | 27                                        |
| 16.5            | Stage IIIA   | 19                | 42                                        |
| 16.5            | Stage IIIB   | 20                | 136                                       |
| 17.5            | Stage IV     | 72                | 24                                        |
| 18              | Stage IIA    | 20                | 25                                        |
| 19.5            | Stage IIIA   | 20                | 13                                        |
| 22.5            | Stage IIA    | 26                | 14                                        |
| 25.5            | Stage IIIA   | 41                | 24                                        |
| 26.5            | Stage IV     | 30                | 41                                        |
| 33              | Stage IIIA   | 40                | 17                                        |
| 39              | Stage IV     | 60                | 0                                         |
| 46              | Stage IV     | 69                | 15                                        |

**e-Table 2.** Treatment of small cell lung cancers

| Treatment                            | Early Stage I,II, occult<br>(N=16) | Late Stage (III/IV)<br>(N=123) |
|--------------------------------------|------------------------------------|--------------------------------|
|                                      | N(%)                               | N(%)                           |
| Surgery (w/ or w/o other modes)      | 11 (69)                            | 5 (4)                          |
| Resection (w/ or w/o other modes)    | 11 (69)                            | 2 (2)                          |
| Radiation (w/ or w/o other modes)    | 9 (56)                             | 64 (52)                        |
| Chemotherapy (w/ or w/o other modes) | 11 (69)                            | 110 (89)                       |
| Specific Combinations                |                                    |                                |
| Surgery Only                         | 5 (31)                             | 1 (1)                          |
| Radiation Only                       | 0 (0)                              | 1 (1)                          |
| Chemo Only                           | 0                                  | 47 (38)                        |
| Radiation & Chemo Only               | 5 (31)                             | 59 (48)                        |
| Surgery & Radiation only             | 0                                  | 0 (0)                          |
| Surgery & Chemo only                 | 2 (13)                             | 0 (0)                          |
| Surgery, Radiation & Chemo           | 4 (25)                             | 4 (3)                          |
| None                                 | 0                                  | 11 (9)                         |

Note: 4 cases had unknown stage. Stage here is "Best" stage.

 CHEST<sup>®</sup> Online Supplement
